# Supplementary material for: Opinion Expression Dynamics in Social Media Chat Groups: An Integrated Quasi‐Experimental and Agent‐Based Model Approach
Source: Hindawi journal article supplement (doi:10.1155/2021/2304754), 2021-01-01
Supplement: f1 [file 2304754.f1.docx]

**Supplementary File**

Note. This code is used for the agent-based model simulation in study 2. The code can be edited and compiled in C++ program.

#include<iostream>

#include<fstream>

#include<random>

#include <iomanip>

#include<time.h>

#include<string>

#include<sstream>

using namespace std;

int main(){

{

int n=100,m=10,r=100;

// assign cluster A number = temp, p and q refer to the percentage of changing willingness.

int temp=50;

double p = 0.20;

double q = 0.20;

//double multi=0.2;

//cin>>m>>r;

double a[100][2];

double b[100];

//

ofstream file1;

ofstream file2;

ofstream file3;

for (int z=1;z<=100;z++)

{

string str;

stringstream ss;

ss<<z;

ss>>str;

file1.open("ans"+str+"_1.csv");

file2.open("ans"+str+"_2.csv");

file3.open("ans"+str+"_3.csv");

random_device rd;

default_random_engine engine(time(nullptr));

uniform_int_distribution<> dis1(1, 100);

uniform_int_distribution<> dis2(1, 1000000000);

//normal distribution of initial willingness

normal_distribution<double> dis3(0.5,1);

normal_distribution<double> dis4(0.5,1);

for (int aaa=0; aaa<1; aaa++)

{

for (int i=0;i<100;i++)

{

if (i<temp) a[i][0]=1; else a[i][0]=-1;

if (i<temp)

{

double c=dis3(engine);while (c>1||c<0) c=dis3(engine);a[i][1]=c;

}

else

{

double c=dis4(engine);while (c>1||c<0) c=dis4(engine);a[i][1]=c;

}

b[i]=a[i][1];

}

int total_prounce=0,total_a=0, total_b=0;

//r represents how many rounds of speaking do we need in this simulation, we set 100.

for (int i=1;i<=r;i++)

{

int num_prounce=0,num_a=0, num_b=0;

double perception=0;

//a is one opinion cluster, b is the opposite opinion cluster.

double prounce[101][2];

double prounce2[101][2];

double prounce3[101][3];

//m is select how many agents to ask whether they choose to speak out or not. we set 10.

for (int j=1;j<=m;j++)

{

int tmp=dis1(engine)-1;

if (dis2(engine)<1000000000*a[tmp][1])

{

num_prounce++;

prounce[num_prounce][0]=a[tmp][0];

prounce[num_prounce][1]=a[tmp][1];

if (a[tmp][0]==1) num_a++;

if (a[tmp][0]==-1) num_b++;

}

}

total_prounce+=num_prounce;

total_a+=num_a;

total_b+=num_b;

double perception1=(num_a+0.00001)/(num_b+0.00001);

double perception2=(total_a+0.00001)/(total_b+0.00001);

double perception3=(num_b+0.00001)/(num_a+0.00001);

double perception4=(total_b+0.00001)/(total_a+0.00001);

//p(initial support) when reaches 15 rounds of speaking.

if (i<15)

{

cout<<"less than 15"<<endl;

for (int j=0;j<n;j++)

{

a[j][1]=a[j][1]+0;

a[j][1]=a[j][1]+0;

if (a[j][1]<0) a[j][1]=0;

if (a[j][1]>1) a[j][1]=1;

}

}

if(i==15)

{

if (total_a<0.9*total_b)

{

//a<50£¬a is the minority

cout<<"a 15"<<endl;

for (int j=0;j<temp;j++)

{

a[j][1]=a[j][1]+a[j][1]*p;

if (a[j][1]<0) a[j][1]=0;

if (a[j][1]>1) a[j][1]=1;

}

//b>50, b is the majority

for (int j=temp;j<100;j++)

{

a[j][1]=a[j][1]-a[j][1]*q;

if (a[j][1]<0) a[j][1]=0;

if (a[j][1]>1) a[j][1]=1;

}

}

else if (total_b<0.9*total_a)

{

//a<50, a is the majority

cout<<"b 15"<<endl;

for (int j=0;j<temp;j++)

{

a[j][1]=a[j][1]-a[j][1]*p;

if (a[j][1]<0) a[j][1]=0;

if (a[j][1]>1) a[j][1]=1;

}

//b>50, b is the minority

for (int j=temp;j<100;j++)

{

a[j][1]=a[j][1]+a[j][1]*q;

if (a[j][1]<0) a[j][1]=0;

if (a[j][1]>1) a[j][1]=1;

}

}

else

{

cout<<"other 15"<<endl;

for (int j=0;j<n;j++)

{

a[j][1]=a[j][1]+0;

a[j][1]=a[j][1]+0;

if (a[j][1]<0) a[j][1]=0;

if (a[j][1]>1) a[j][1]=1;

}

}

}

if(i>15)

{

//p(later support) in every round of speaking after 15 rounds.

if (perception1<perception2)

{

//a<50, minority

cout<<num_a<<"a more than 15"<<endl;

for (int j=0;j<temp;j++)

{

a[j][1]=a[j][1]+a[j][1]*p;

if (a[j][1]<0) a[j][1]=0;

if (a[j][1]>1) a[j][1]=1;

}

//b>50, majority

for (int j=temp;j<100;j++)

{

a[j][1]=a[j][1]-a[j][1]*q;

if (a[j][1]<0) a[j][1]=0;

if (a[j][1]>1) a[j][1]=1;

}

}

else if (perception3<perception4)

{

//a<50, majority

cout<<num_b<<"b more than 15"<<endl;

for (int j=0;j<temp;j++)

{

a[j][1]=a[j][1]-a[j][1]*p;

if (a[j][1]<0) a[j][1]=0;

if (a[j][1]>1) a[j][1]=1;

}

//b>50, minority

for (int j=temp;j<100;j++)

{

a[j][1]=a[j][1]+a[j][1]*q;

if (a[j][1]<0) a[j][1]=0;

if (a[j][1]>1) a[j][1]=1;

}

}

else

{

cout<<"other more than 15"<<endl;

for (int j=0;j<n;j++)

{

a[j][1]=a[j][1]+0;

a[j][1]=a[j][1]+0;

if (a[j][1]<0) a[j][1]=0;

if (a[j][1]>1) a[j][1]=1;

}

}

}

double sum1=0,sum2=0;

for (int j=0;j<temp;j++)

sum1+=a[j][1];

for (int j=temp;j<n;j++)

sum2+=a[j][1];

cout<<sum1<<" "<<sum2<<" "<<total_a<<" "<<total_prounce-total_a<<endl;

for (int j=0;j<100;j++)

{

file1<<a[j][1]<<",";

}

file2<<sum1<<","<<sum2<<","<<total_a<<","<<total_prounce-total_a<<",";

file1<<endl;

file2<<endl;

}

file3<<total_a<<","<<total_prounce-total_a<<",";

file3<<endl;

file1.close();

file2.close();

file3.close();

}

}

}

}
